# Supplementary material for: Formation of compounds with diverse polyelectrolyte morphologies and nonlinear ion conductance in a two-dimensional nanofluidic channel
Source: Royal Society of Chemistry journal article supplement (doi:10.1039/d4sc01071j), 2024-01-01
Supplement: d4sc01071j11.pdf [file d4sc01071j11.pdf]

## Electronic Supplementary Information

### Formation of compounds with diverse polyelectrolyte morphologies and nonlinear ion conductance in a two-dimensional nanofluidic channel

Xiaoying Liang,<sup>‡a</sup> Yanan Zhou,<sup>‡b</sup> Weiduo Zhu,<sup>c</sup> Wen Wu Xu,<sup>a</sup> Joseph S. Francisco,<sup>\*d</sup>  
Xiao Cheng Zeng <sup>\*e</sup> and Wenhui Zhao<sup>\*a</sup>

<sup>a</sup>*Department of Physics, Ningbo University, Ningbo, Zhejiang 315211, China*

<sup>b</sup>*School of Material Science and Chemical Engineering, Institute of Mass Spectrometry,  
Ningbo University, Ningbo 315211, China*

<sup>c</sup>*Department of Physics, Hefei University of Technology, Hefei, Anhui 230009, China*

<sup>d</sup>*Department of Chemistry, University of Pennsylvania, Philadelphia, Pennsylvania  
19104, United States*

<sup>e</sup>*Department of Materials Science & Engineering, City University of Hong Kong,  
Kowloon 999077 Hong Kong, China*

<sup>‡</sup>X.L. and Y.Z. contributed equally to this work.

\*Authors to whom correspondence should be addressed: [zhaowenhui@nbu.edu.cn](mailto:zhaowenhui@nbu.edu.cn),  
[xzeng26@cityu.edu.hk](mailto:xzeng26@cityu.edu.hk), or [frjoseph@sas.upenn.edu](mailto:frjoseph@sas.upenn.edu)

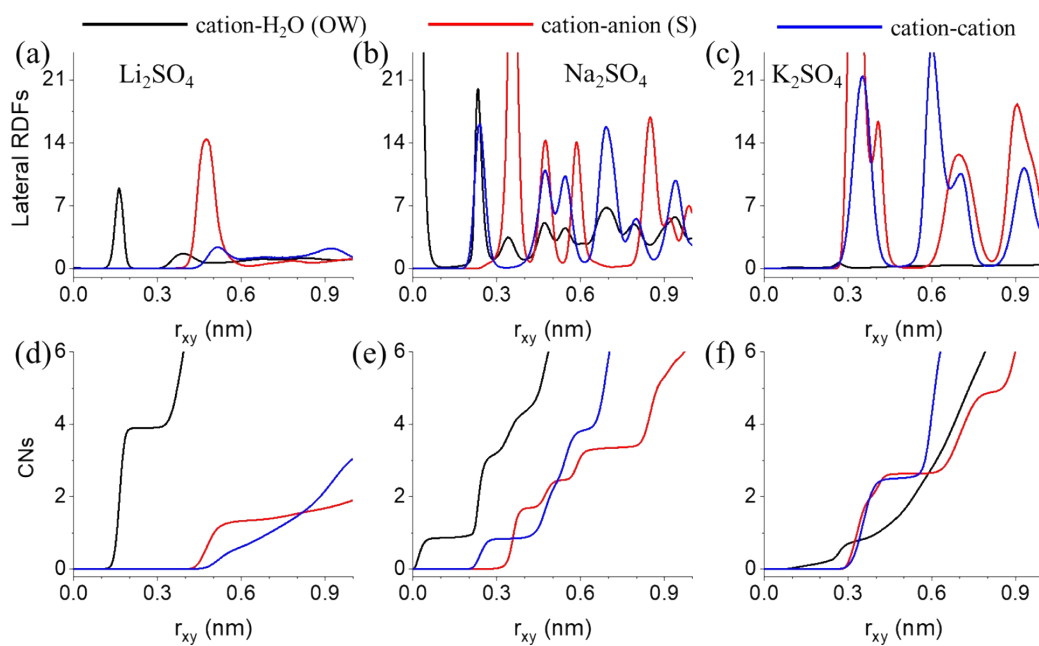

**Fig. S1.** (a-c) Lateral RDFs of cation- $\text{H}_2\text{O}$ , cation-cation and cation-anion in the case of (a)  $\text{Li}_2\text{SO}_4$  polyelectrolyte-like chains, (b)  $4\text{Na}\cdot 2\text{SO}_4\cdot 6\text{H}_2\text{O}$  hydrated salt, and (c)  $\text{K}_2\text{SO}_4$  ionic crystal, respectively. (d-f) Corresponding CNs of the three polyelectrolytes.

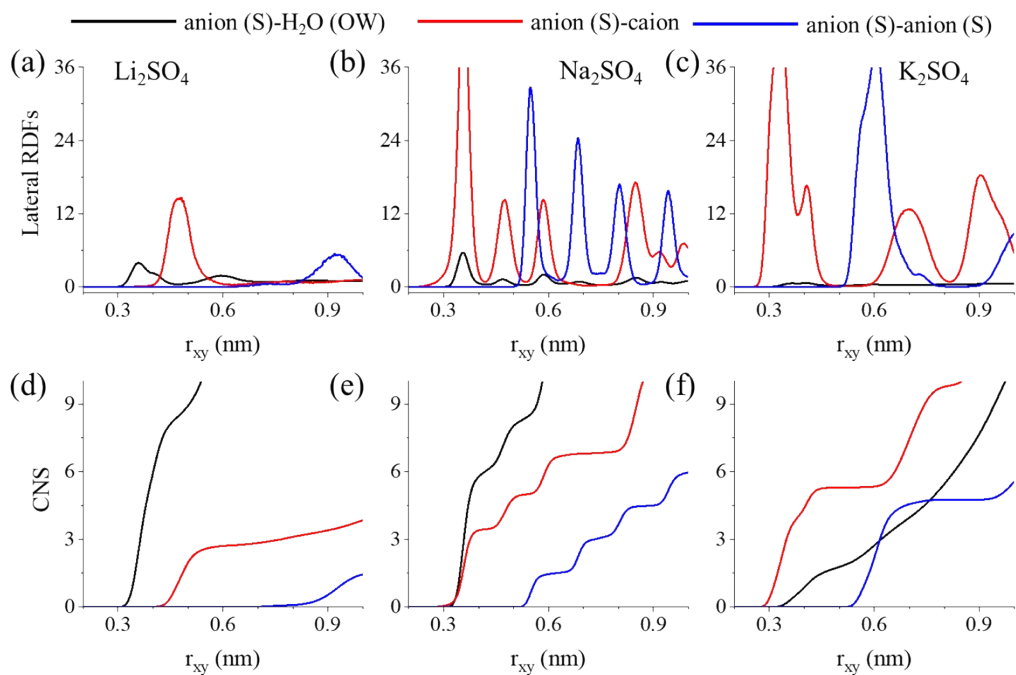

**Fig. S2.** (a-c) Lateral RDFs of anion- $\text{H}_2\text{O}$ , anion-cation and anion-anion in the case of (a)  $\text{Li}_2\text{SO}_4$  polyelectrolyte-like chains, (b)  $4\text{Na}\cdot 2\text{SO}_4\cdot 6\text{H}_2\text{O}$  hydrated salt, and (c)  $\text{K}_2\text{SO}_4$  ionic crystal, respectively. (d-f) Corresponding CNs of the three polyelectrolytes.

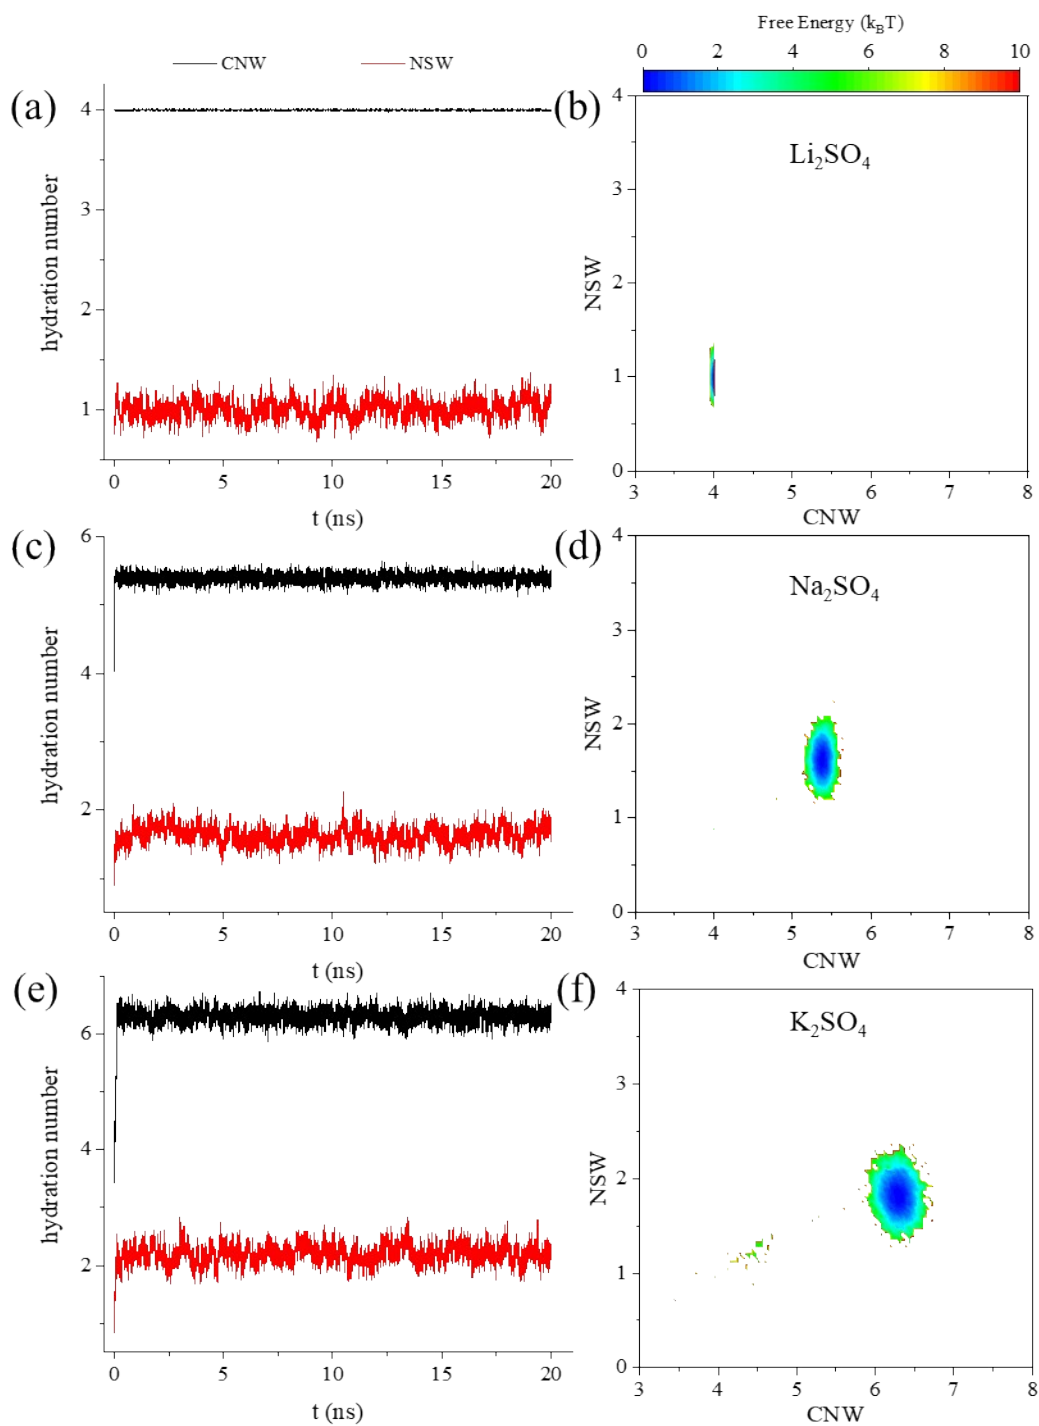

**Fig. S3.** The hydration number in bulk electrolyte solutions. The time-dependent average coordination number of water molecules (CNW) per cation and the number of shared water molecules (NSW) between cations and anions, computed based on representative snapshots during the 20 ns simulations of (a)  $\text{Li}_2\text{SO}_4$ , (c)  $\text{Na}_2\text{SO}_4$  and (e)  $\text{K}_2\text{SO}_4$  aqueous solution in bulk. (b, d, f) The corresponding 2D conformational free energy landscapes.

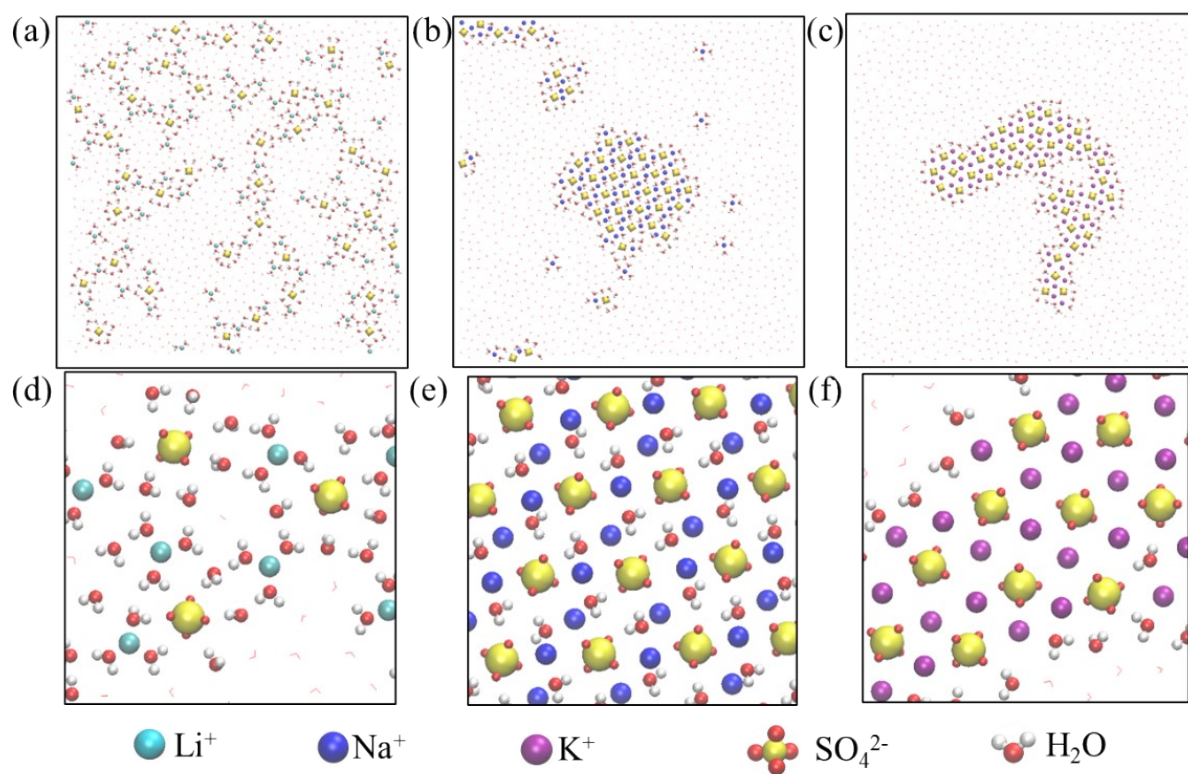

**Fig. S4.** Monolayer polyelectrolytes of alkali sulfates in the nanoslit with the width  $D = 0.75$  nm. Top views of snapshots of (a)  $\text{Li}_2\text{SO}_4$  polyelectrolyte-like chains, (b) a  $4\text{Na}\cdot 2\text{SO}_4\cdot 6\text{H}_2\text{O}$  hydrated salt, and (c) a  $\text{K}_2\text{SO}_4$  ionic crystal. (d-f) The corresponding magnified top view of a portion of the snapshots.

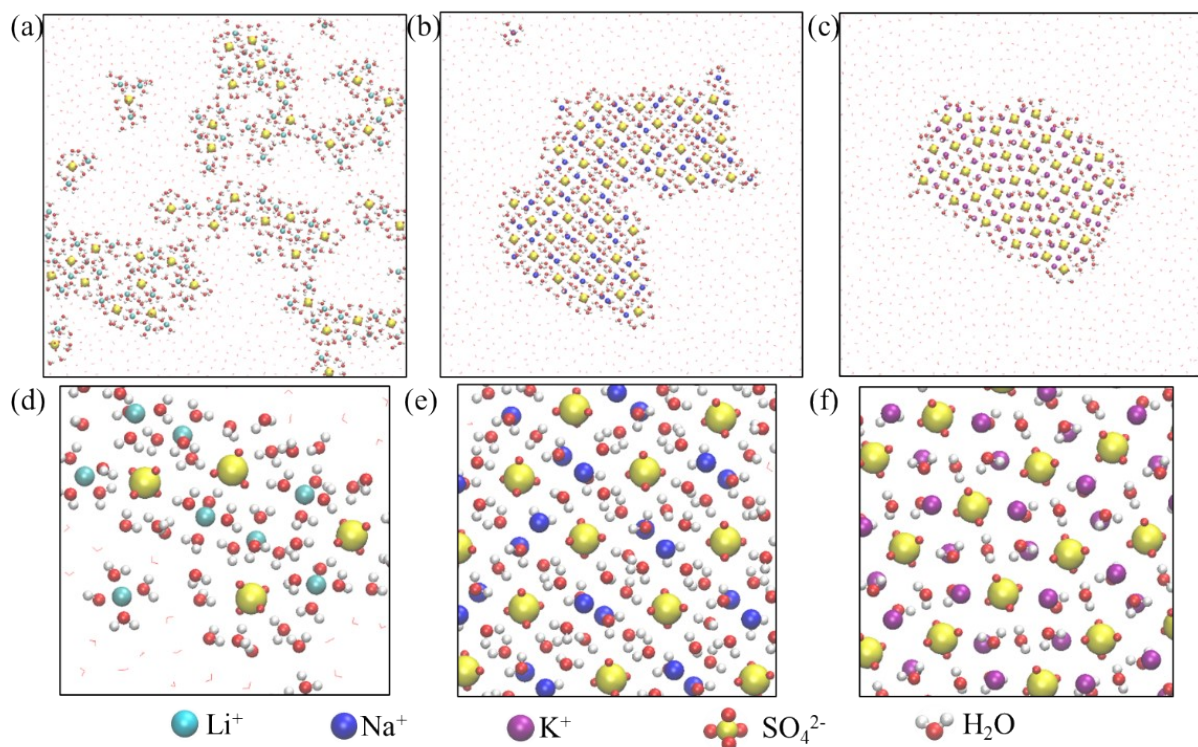

**Fig. S5.** Monolayer polyelectrolytes of alkali sulfates in the nanoslit with the width  $D = 0.85$  nm. Top views of snapshots of (a)  $\text{Li}_2\text{SO}_4$  polyelectrolyte-like chains, (b) a  $\text{Na}_2\text{SO}_4$ -hydrated salt, and (c) a  $4\text{K}\cdot 2\text{SO}_4\cdot 6\text{H}_2\text{O}$  hydrated salt. (d-f) The corresponding magnified top view of a portion of the snapshots.

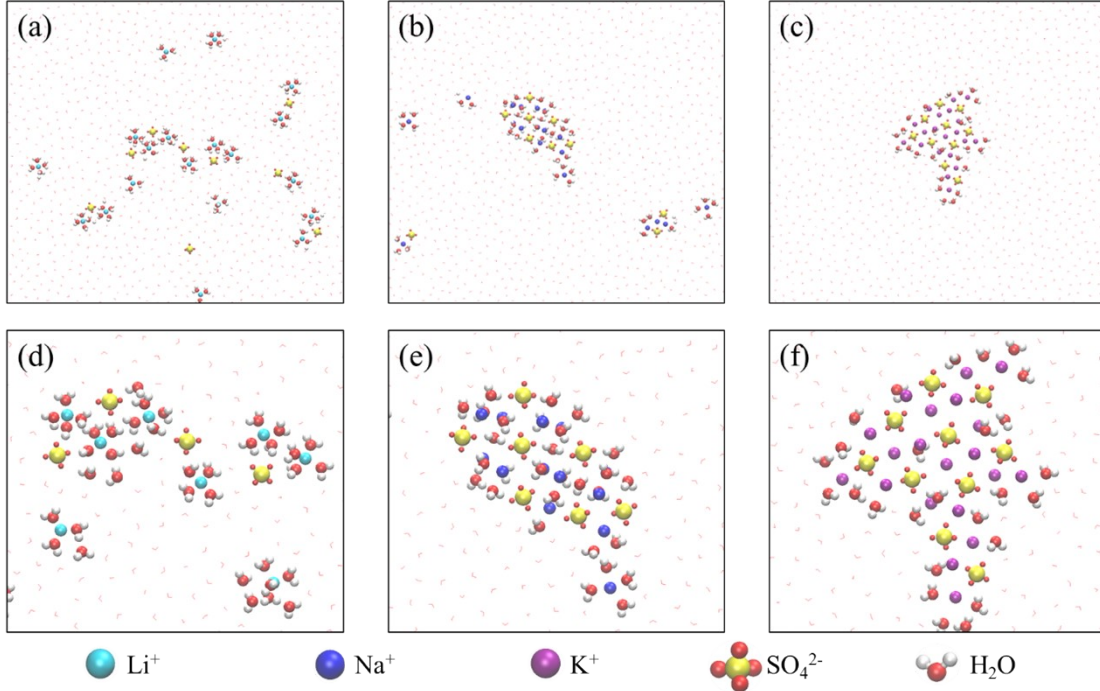

**Fig. S6.** Monolayer polyelectrolytes of alkali sulfates in the nanoslit with the width  $D = 0.8$  nm with only 10 anions and 20 monovalent cations. Top views of snapshots of (a)  $\text{Li}_2\text{SO}_4$  polyelectrolyte-like chains, (b) a  $4\text{Na}\cdot 2\text{SO}_4\cdot 6\text{H}_2\text{O}$  hydrated salt, and (c) a  $\text{K}_2\text{SO}_4$  ionic crystal. (d-f) The corresponding magnified top view of a portion of the snapshots.

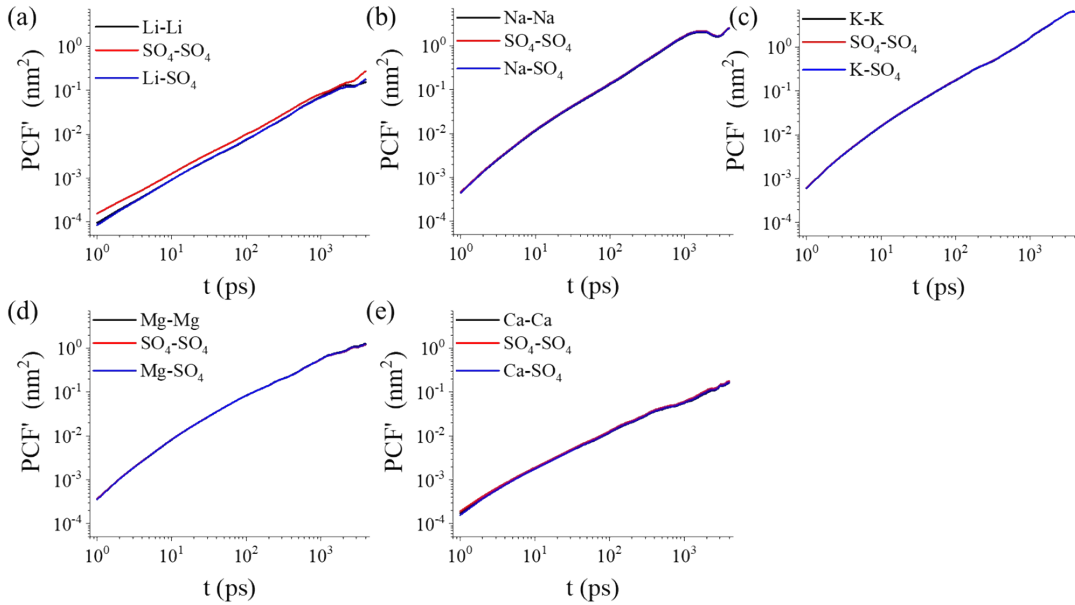

**Fig. S7.** The  $PCF'$  vs time for the (a)  $\text{Li}_2\text{SO}_4$ , (b)  $\text{Na}_2\text{SO}_4$ , (c)  $\text{K}_2\text{SO}_4$ , (d)  $\text{MgSO}_4$ , and (e)  $\text{CaSO}_4$  aqueous solutions confined in the nanoslit. Here  $PCF'_{ab}(t) = \langle [\vec{R}_a(t) - \vec{R}_a(0)] \cdot [\vec{R}_b(t) - \vec{R}_b(0)] \rangle$ , and

$$PCF_{ab}(t) = \frac{V}{4k_B T} PCF'_{ab}(t) \quad \text{for the two-dimensional ionic aqueous solution.}$$

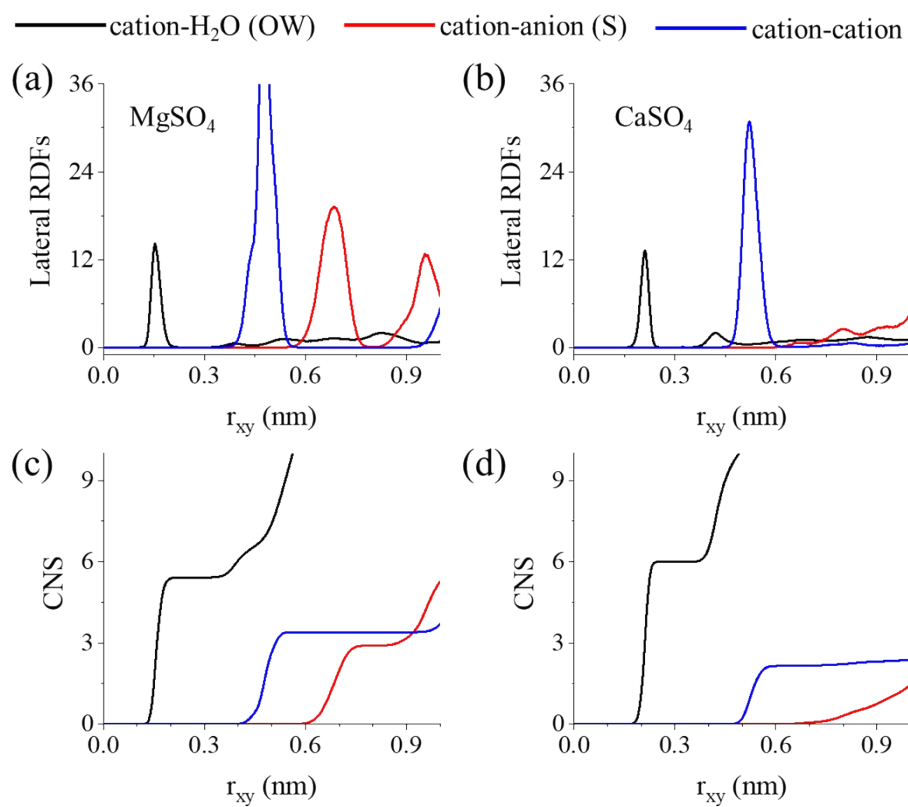

**Fig. S8.** (a-b) Lateral RDFs of cation- $\text{H}_2\text{O}$ , cation-anion and cation-cation in the case of (a)  $\text{MgSO}_4 \cdot 6\text{H}_2\text{O}/\text{MgSO}_4 \cdot 4\text{H}_2\text{O}$  hydrated salt and (b)  $\text{CaSO}_4$  polyelectrolyte-like chains, respectively. c-d) Corresponding CNs of the two polyelectrolytes.

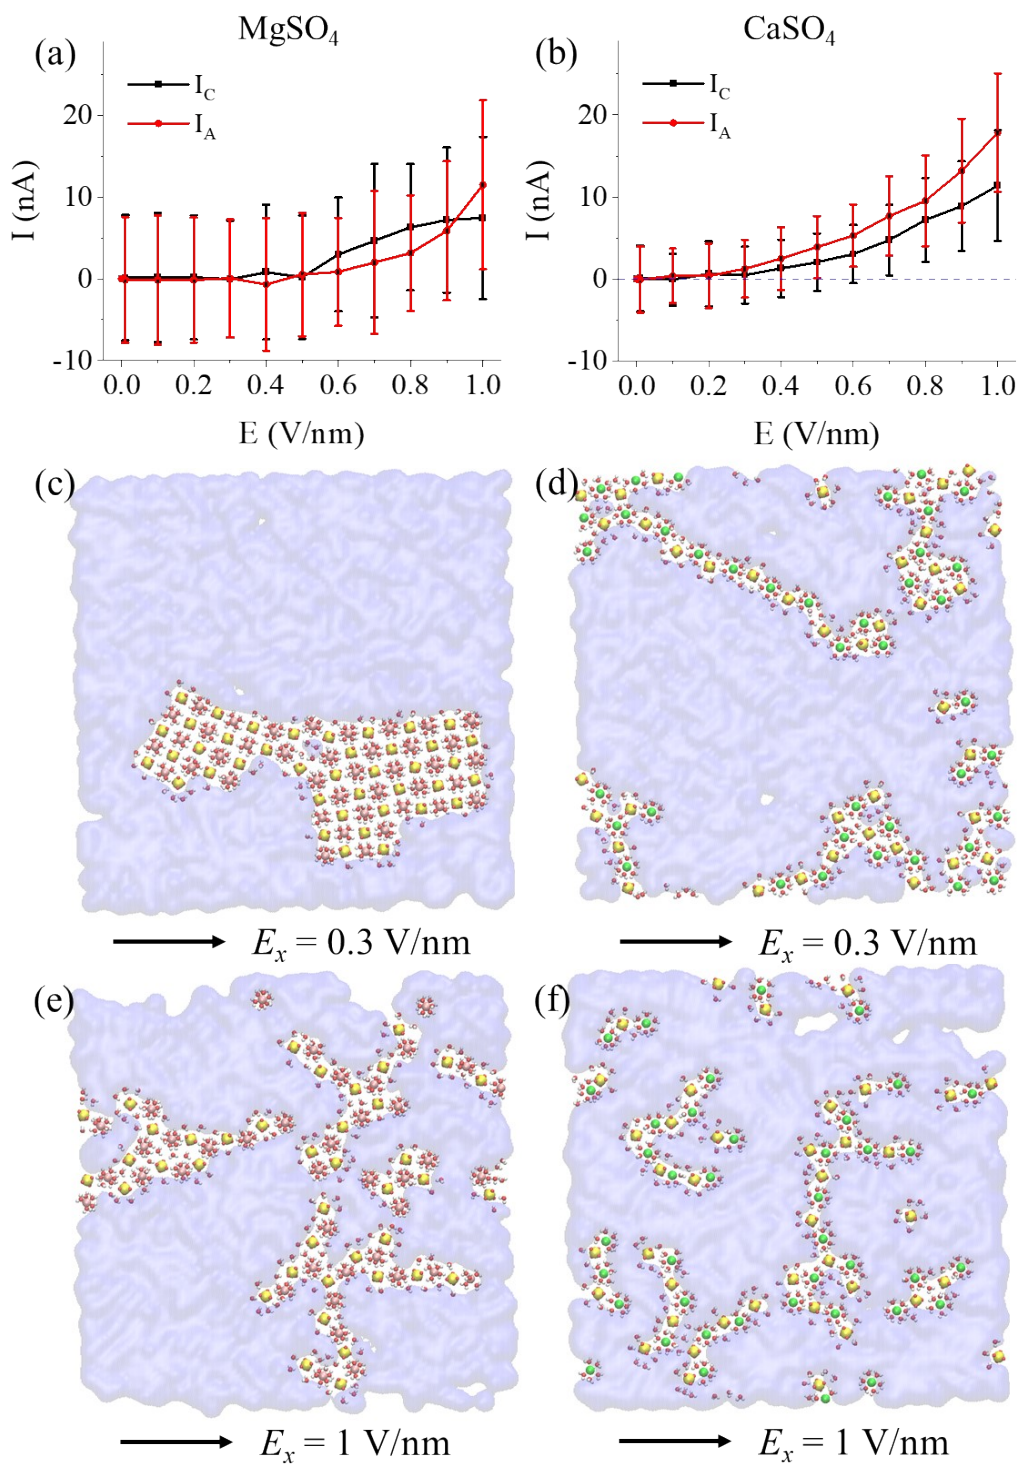

**Fig. S9.** Decomposition of ion current of (a) MgSO<sub>4</sub>, and (b) CaSO<sub>4</sub> polyelectrolytes to cationic current ( $I_C$ ) and anionic current ( $I_A$ ), respectively. Corresponding snapshots under  $E_x = 0.3$  V/nm (c-d) and  $E_x = 1$  V/nm (e-f), respectively.



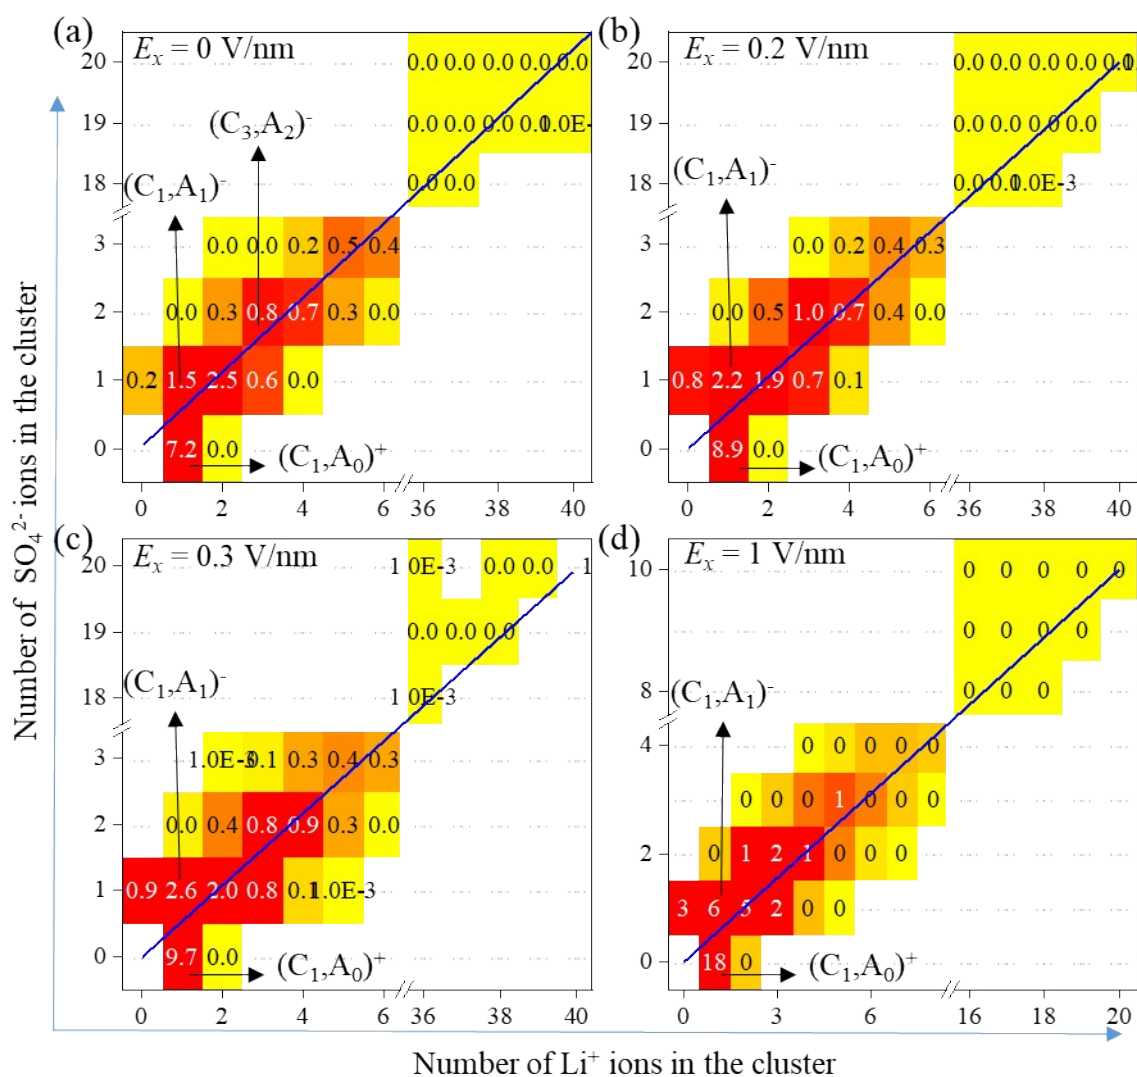

**Fig. S10.** Cluster distribution of the  $\text{Li}_2\text{SO}_4$  system as a function of electric field  $E_x =$  (a) 0 V/nm, (b) 0.2 V/nm, (c) 0.3 V/nm, and (d) 1.0 V/nm, respectively. The symbol  $(\text{C}_i, \text{A}_j)^{i-2j}$  represented a cluster comprising  $i$  Cations and  $j$  Anions with a charge of  $i-2j$ . The number in the figures indicated the average number of a given cluster per snapshot. The blue oblique line  $i = 2j$  suggested the neutral clusters.

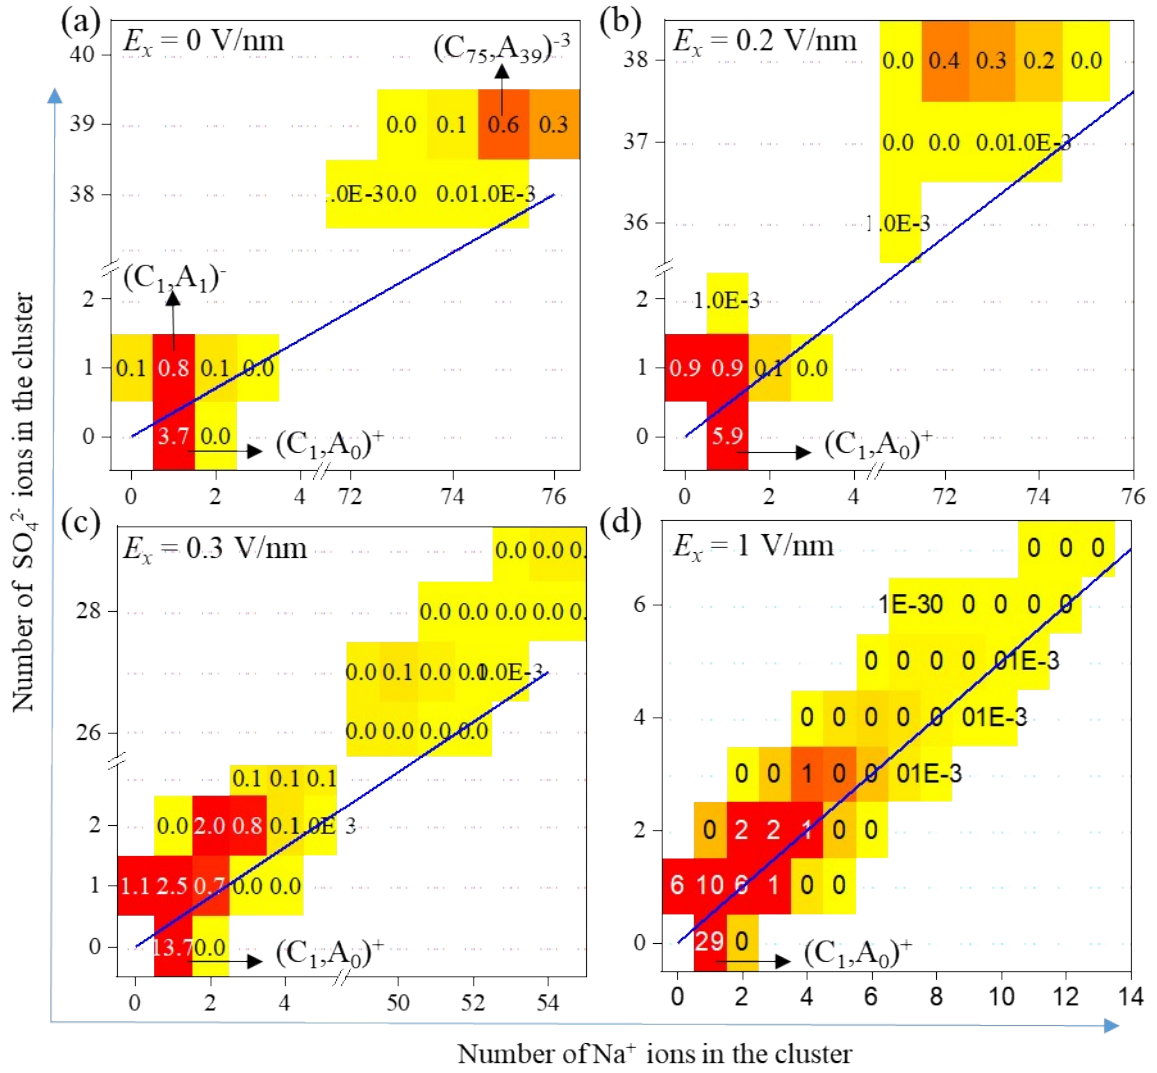

**Fig. S11.** Cluster distribution of the  $\text{Na}_2\text{SO}_4$  system as a function of electric field  $E_x =$  (a) 0 V/nm, (b) 0.2 V/nm, (c) 0.3 V/nm, and (d) 1.0 V/nm, respectively. The symbol  $(C_i, A_j)^{i-2j}$  represented a cluster comprising  $i$  Cations and  $j$  Anions with a charge of  $i-2j$ . The number in the figures indicated the average number of a given cluster per snapshot. The blue oblique line  $i = 2j$  suggested the neutral clusters.

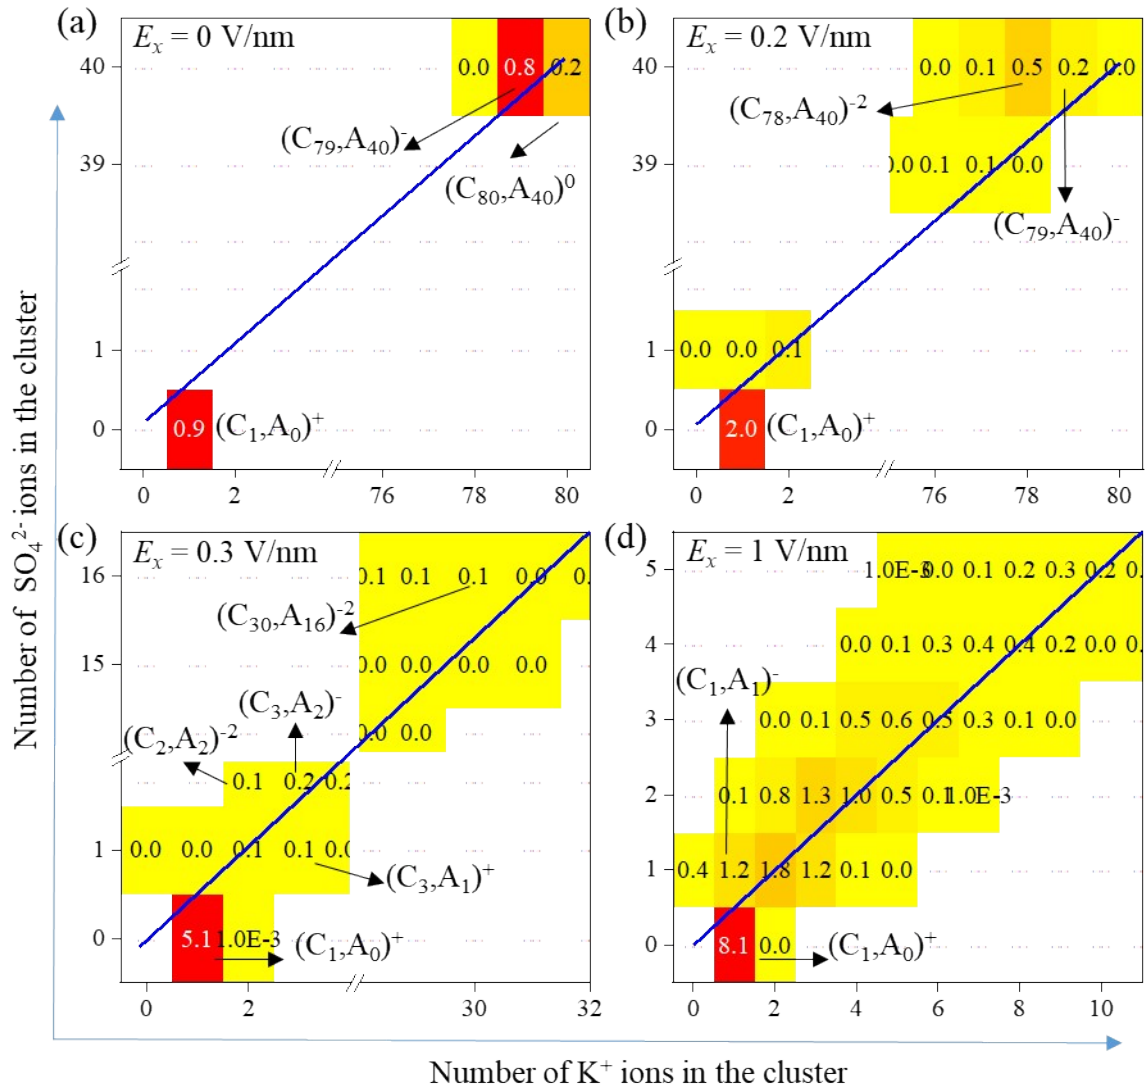

**Fig. S12.** Cluster distribution of the  $K_2SO_4$  system as a function of electric field  $E_x =$  (a) 0 V/nm, (b) 0.2 V/nm, (c) 0.3 V/nm, and (d) 1.0 V/nm, respectively. The symbol  $(C_i, A_j)^{i-2j}$  represented a cluster comprising  $i$  Cations and  $j$  Anions with a charge of  $i-2j$ . The number in the figures indicated the average number of a given cluster per snapshot. The blue oblique line  $i = 2j$  suggested the neutral clusters.

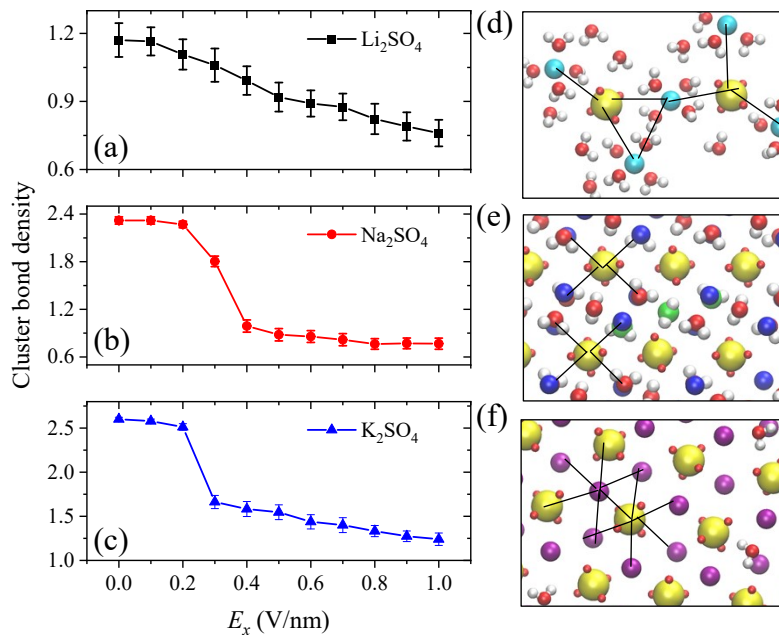

**Fig. S13.** Cluster bond density in aqueous of (a)  $\text{Li}_2\text{SO}_4$ , (b)  $\text{Na}_2\text{SO}_4$  and (a)  $\text{K}_2\text{SO}_4$  as the function of the electric field ( $E_x$ ). (d-e) The ion associations within the  $\text{Li}_2\text{SO}_4$  chain,  $4\text{Na}\cdot 2\text{SO}_4\cdot 6\text{H}_2\text{O}$  hydrated salt, and  $\text{K}_2\text{SO}_4$  ionic crystal in absence of electric field. Here, the associations between ions and water molecules were neglected. The cluster bond density of the  $\text{Li}_2\text{SO}_4$  chain exceeded 1, primarily due to cation-cation associations.

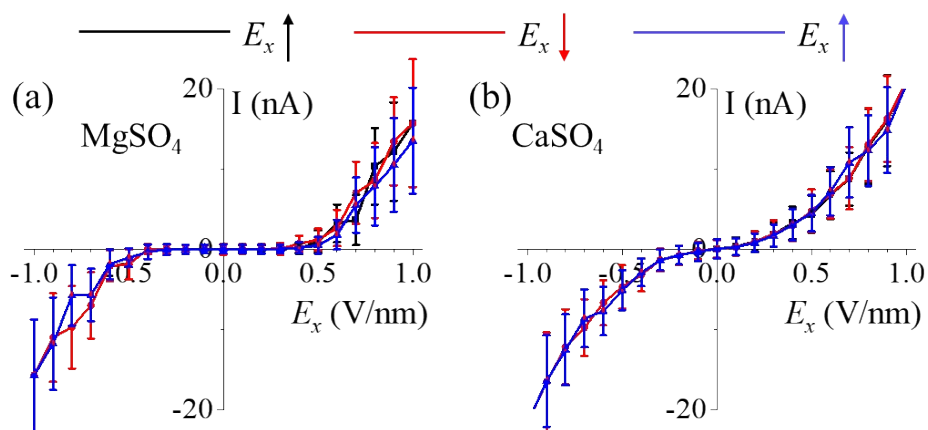

**Fig. S14.** The  $I$ - $V$  characteristics of the electrolyte aqueous solutions in the angstrom-scale slit for (a)  $\text{MgSO}_4$  and (b)  $\text{CaSO}_4$ .
